# Supplementary material for: How Context Matters: Change and Persistence of Homophobic Attitudes among Cameroonian Migrants in Switzerland
Source: MDPI journal article supplement (doi:10.3390/sexes3040038), 2022-10-18
Supplement: s1 [file s1]

**Table S1.** Descriptive statistics for histogram on attitudes among home based Cameroonians.

|                 | Observations | Obs. with missing data | Obs. without missing data | Minimum | Maximum | Mean  | Std. deviation |
|-----------------|--------------|------------------------|---------------------------|---------|---------|-------|----------------|
| Attitude rating | 400          | 0                      | 400                       | 1,605   | 5,000   | 4,255 | 0,564          |

|  | Lower bound | Upper bound | Frequency | Relative frequency | Density (Data) | Density (Distribution) |
|--|-------------|-------------|-----------|--------------------|----------------|------------------------|
|  | 1           | 1,41        | 0         | 0,000              | 0,000          | 0,000                  |
|  | 1,41        | 1,82        | 1         | 0,003              | 0,006          | 0,000                  |
|  | 1,82        | 2,23        | 1         | 0,003              | 0,006          | 0,000                  |
|  | 2,23        | 2,64        | 3         | 0,008              | 0,018          | 0,002                  |
|  | 2,64        | 3,05        | 9         | 0,023              | 0,055          | 0,014                  |
|  | 3,05        | 3,46        | 19        | 0,048              | 0,116          | 0,063                  |
|  | 3,46        | 3,87        | 61        | 0,153              | 0,372          | 0,168                  |
|  | 3,87        | 4,28        | 93        | 0,233              | 0,567          | 0,270                  |
|  | 4,28        | 4,69        | 117       | 0,293              | 0,713          | 0,262                  |
|  | 4,69        | 5,1         | 96        | 0,240              | 0,585          | 0,153                  |

**Table S2.** Descriptive statistics for histogram on attitudes among Cameroonian migrants in Switzerland.

|                 | Variable | Observations | Obs. with missing data | Obs. without missing data | Minimum | Maximum | Mean  | Std. deviation |
|-----------------|----------|--------------|------------------------|---------------------------|---------|---------|-------|----------------|
| Attitude rating |          | 100          | 0                      | 100                       | 1,000   | 5,000   | 3,383 | 0,952          |

|  | Lower bound | Upper bound | Frequency | Relative frequency | Density (Data) | Density (Distribution) |
|--|-------------|-------------|-----------|--------------------|----------------|------------------------|
|  | 1           | 1,41        | 5         | 0,050              | 0,122          | 0,013                  |
|  | 1,41        | 1,82        | 1         | 0,010              | 0,024          | 0,031                  |
|  | 1,82        | 2,23        | 9         | 0,090              | 0,220          | 0,063                  |
|  | 2,23        | 2,64        | 7         | 0,070              | 0,171          | 0,105                  |
|  | 2,64        | 3,05        | 11        | 0,110              | 0,268          | 0,146                  |
|  | 3,05        | 3,46        | 13        | 0,130              | 0,317          | 0,169                  |
|  | 3,46        | 3,87        | 22        | 0,220              | 0,537          | 0,163                  |
|  | 3,87        | 4,28        | 17        | 0,170              | 0,415          | 0,131                  |
|  | 4,28        | 4,69        | 8         | 0,080              | 0,195          | 0,088                  |
|  | 4,69        | 5,1         | 7         | 0,070              | 0,171          | 0,049                  |

**Table S3.** t-test calculation in XLSTAT.

| Variable                                                          | Observations | Obs. with missing data | Obs. without missing data | Minimum | Maximum | Mean  | Std. deviation |
|-------------------------------------------------------------------|--------------|------------------------|---------------------------|---------|---------|-------|----------------|
| Attitude rating   Respondents-Cameroonian migrants in Switzerland | 100          | 0                      | 100                       | 1,000   | 5,000   | 3,383 | 0,952          |
| Attitude rating   Respondents-Home-based Cameroonians             | 400          | 0                      | 400                       | 1,605   | 5,000   | 4,255 | 0,564          |

95% confidence interval on the difference between the means:

[ -1,017; -0,728 ]

|                      |         |
|----------------------|---------|
| Difference           | -0,872  |
| t (Observed value)   | -11,839 |
| t  (Critical value)  | 1,965   |
| DF                   | 498     |
| p-value (Two-tailed) | <0,0001 |
| alpha                | 0,050   |

Test interpretation:

H0: The difference between the means is equal to 0.

Ha: The difference between the means is different from 0.

As the computed p-value is lower than the significance level  $\alpha=0,05$ , one should reject the null hypothesis H0, and accept the alternative hypothesis Ha.
